# Supplementary material for: hDNA2 nuclease/helicase promotes centromeric DNA replication and genome stability
Source: PubMed Central journal article supplement (PMC6043852; doi:10.15252/embj.201796729), 2018-05-17

**Fig 2D** 5' labeled substrates

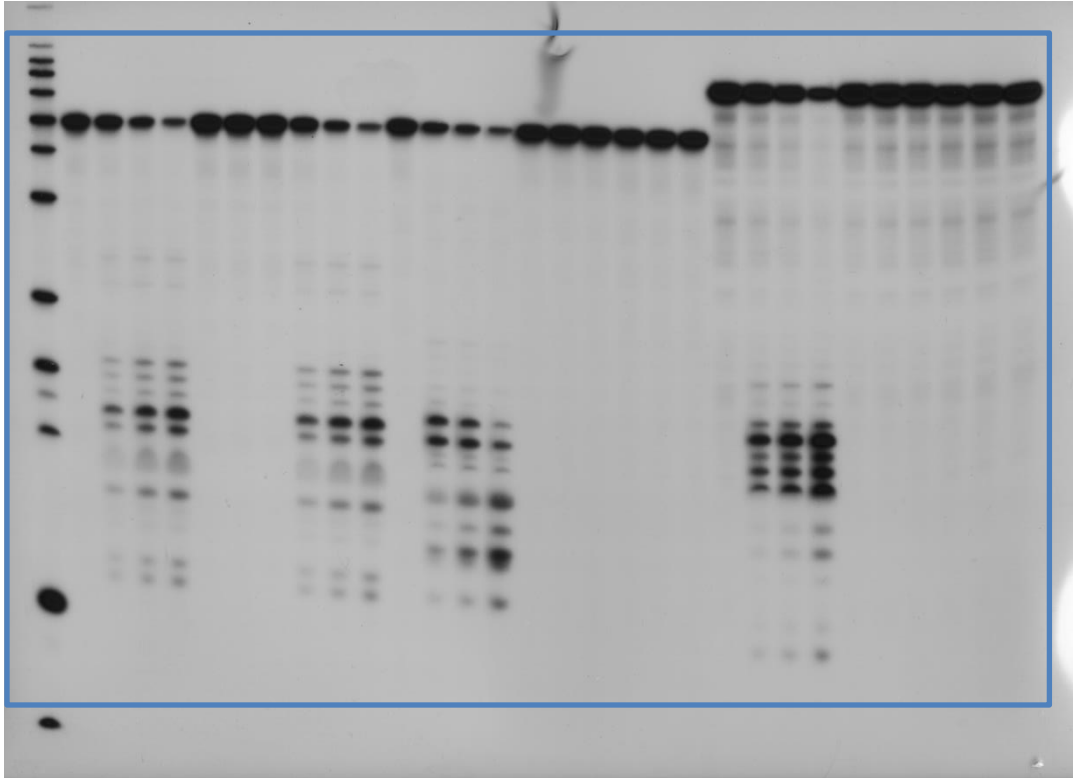

**Fig 2E** 3' labeled substrates

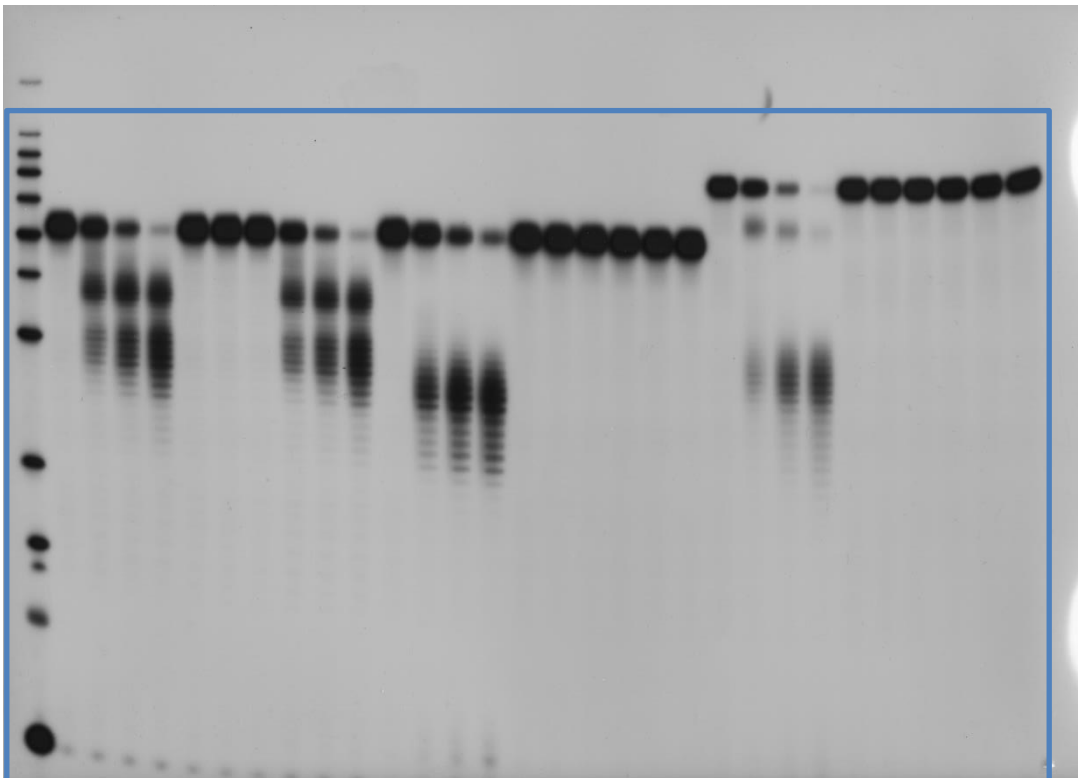

Supplement: EMBJ-37-e96729-s003.pdf [file EMBJ-37-e96729-s003.pdf]
