# Supplementary material for: hDNA2 nuclease/helicase promotes centromeric DNA replication and genome stability
Source: PubMed Central journal article supplement (PMC6043852; doi:10.15252/embj.201796729), 2018-05-17

**Fig 4 B**

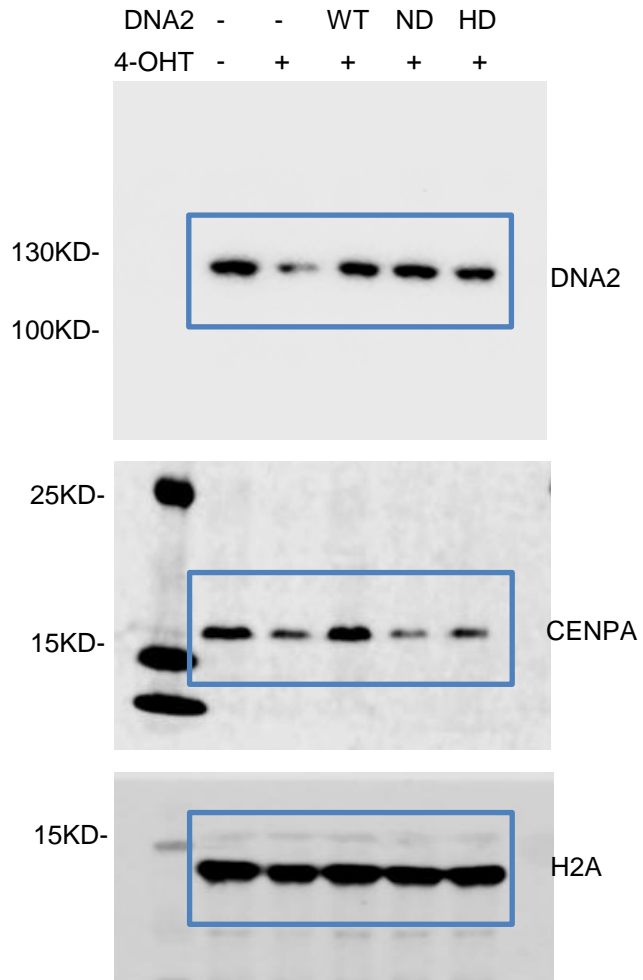

Supplement: EMBJ-37-e96729-s004.pdf [file EMBJ-37-e96729-s004.pdf]
